# Supplementary material for: Visualisation of dCas9 target search in vivo using an open-microscopy framework
Source: PubMed Central journal article supplement (PMC6685946; doi:10.1038/s41467-019-11514-0), 2019-08-07
Supplement: 41467_2019_11514_MOESM1_ESM.pdf [file 41467_2019_11514_MOESM1_ESM.pdf]

# Visualisation of dCas9 target search *in vivo* using an open-microscopy framework

Martens et al., 2019

## Supplementary Information

### Contents

|                                                                                                                 |    |
|-----------------------------------------------------------------------------------------------------------------|----|
| Supplementary Figure 1: Effect of state transitions on diffusion coefficient histogram.....                     | 2  |
| Supplementary Figure 2: The open-source miCube single-particle microscope.....                                  | 3  |
| Supplementary Figure 3: Typical drift experienced by the miCube.....                                            | 4  |
| Supplementary Figure 4: Individual pNonTarget and pTarget distributions.....                                    | 5  |
| Supplementary Figure 5: no-sgRNA distributions fitted with MC-DDA or the target-binding model.....              | 6  |
| Supplementary Figure 6: Effect of dCas9 on pTarget copy number.....                                             | 7  |
| Supplementary Figure 7: Outline of the pLAB-dCas9 vector.....                                                   | 8  |
| Supplementary Figure 8: pNonTarget and pTarget construction and verification.....                               | 9  |
| Supplementary Figure 9: Schematic representation of obtaining cellular dCas9 copy number from number of tracks. | 10 |
| Supplementary Figure 10: Technical drawing of miCube component: Main cube.....                                  | 11 |
| Supplementary Figure 11: Technical drawing of miCube component: Top cover 1.....                                | 12 |
| Supplementary Figure 12: Technical drawing of miCube component: Top cover 2.....                                | 13 |
| Supplementary Figure 13: Technical drawing of miCube component: Tube lens holder.....                           | 14 |
| Supplementary Figure 14: Technical drawing of miCube component: Excitation connector.....                       | 15 |
| Supplementary Figure 15: Technical drawing of miCube component: Bracket clamp.....                              | 16 |
| Supplementary Figure 16: Technical drawing of miCube component: Right-angled bracket.....                       | 17 |
| Supplementary Figure 17: Technical drawing of miCube component: Astigmatism block.....                          | 18 |
| Supplementary Figure 18: Technical drawing of miCube component: Camera mount.....                               | 19 |
| Supplementary Note 1: DNA and amino acid sequences.....                                                         | 20 |
| Supplementary Table 1: Descriptive list of miCube components.....                                               | 22 |
| Supplementary Table 2: List of vectors.....                                                                     | 26 |
| Supplementary Table 3: List of oligonucleotides.....                                                            | 27 |
| Supplementary Table 4: List of primers.....                                                                     | 27 |
| Supplementary Table 5: Adjustment of the 405 nm laser power during sptPALM experiments.....                     | 28 |

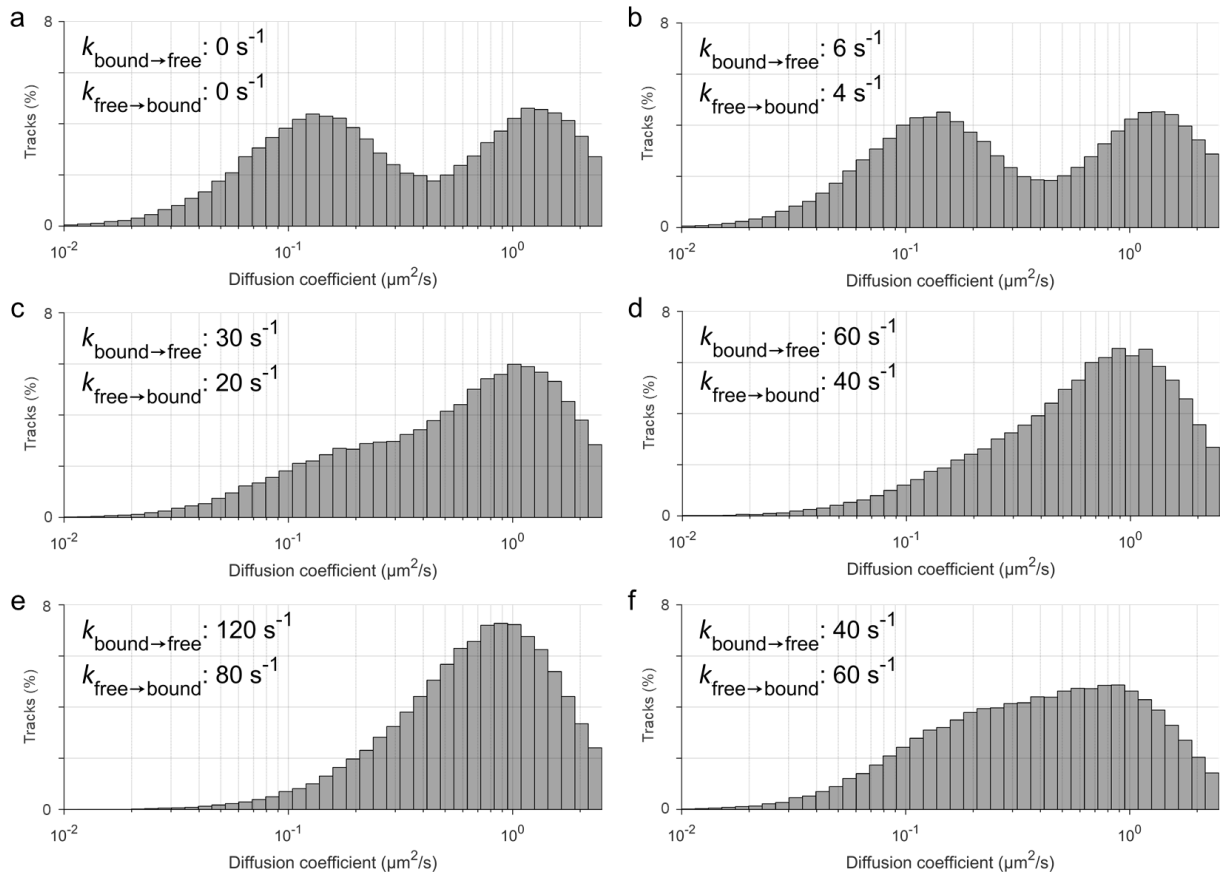

### Supplementary Figure 1: Effect of state transitions on diffusion coefficient histogram

The pNonTarget model as described in Methods was ran with varying  $k_{\text{bound} \rightarrow \text{free}}$  and  $k_{\text{free} \rightarrow \text{bound}}$  values as indicated in the figure, while keeping the localization error and  $D_{\text{free}}$  constant at the values determined while fitting the actual data (38 nm and  $2.0 \mu\text{m}^2/\text{s}$ , respectively). **a** Diffusion coefficient histogram if no state transitions would be present. **b - e** Diffusion coefficient histograms with the same  $k_{\text{bound} \rightarrow \text{free}} : k_{\text{free} \rightarrow \text{bound}}$  ratio as the determined best-fitting values of  $\sim 3:2$ , while varying the absolute values of the two. **f** Diffusion coefficient histogram if the kinetic parameters were swapped.

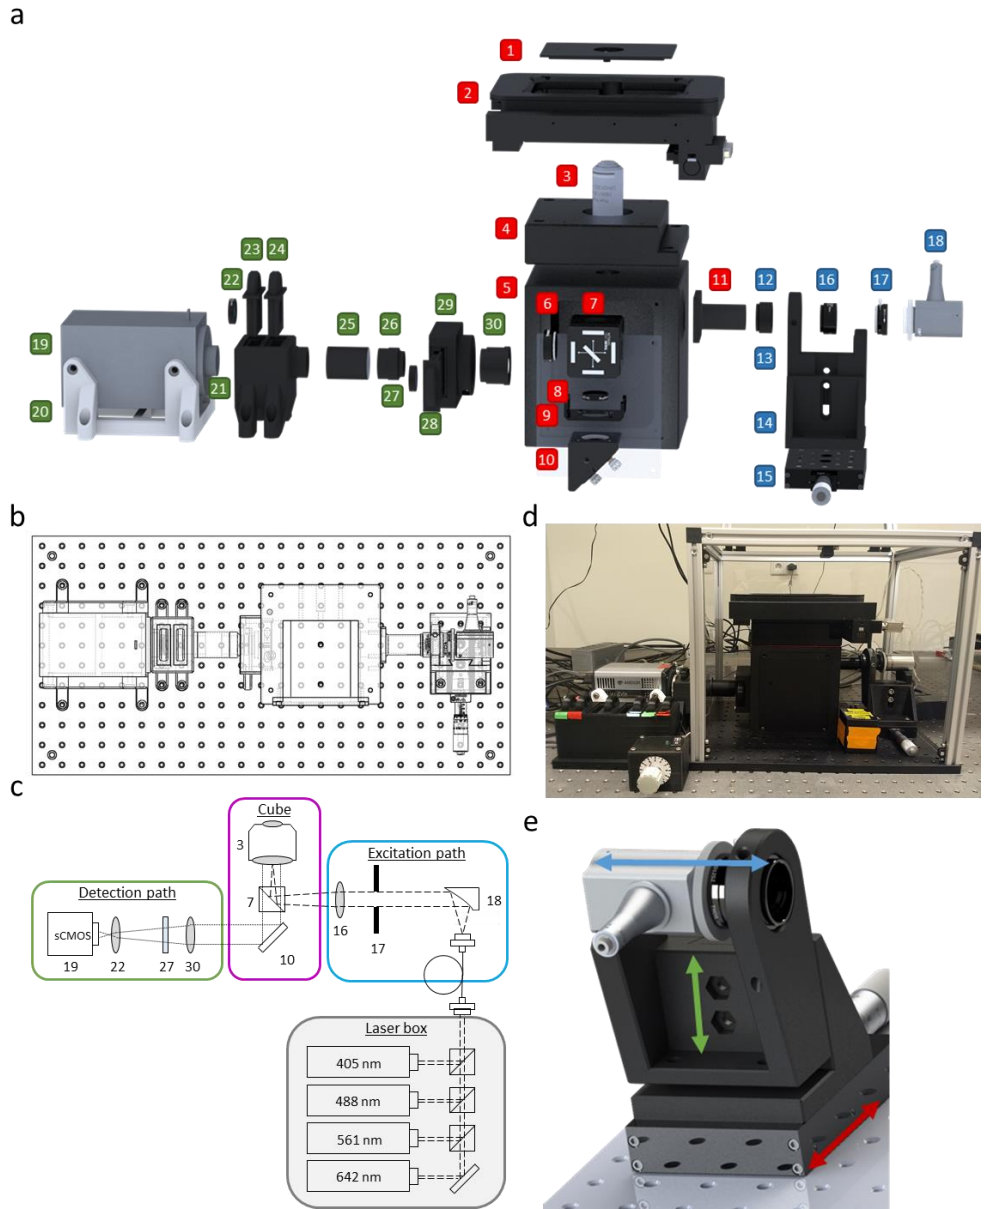

### Supplementary Figure 2: The open-source miCube single-particle microscope

**a** Exploded render of the miCube highlighting individual components. A full list of components indicated by the numbered items can be found in Supplementary Table 5. **b** Top-down schematic view of the miCube on the breadboard, allowing clear view of mounting positions. Distance between mounting holes on the breadboard is 25 mm. **c** Schematic overview of the miCube instrument. Numbered items correspond to the items in **a** and Supplementary Table 5. The excitation path is visualized with dashed lines, the emission path is visualized with dotted lines. **d** Photograph of the fully assembled miCube as used for measurements in this manuscript. **e** Detailed view of the miCube excitation path. This sub-assembly is comprised of numbers 12-18. Arrows indicate isolated movement in the three spatial dimensions: distance from objective (blue), height of excitation unit (green), and horizontal position with respect to the objective (red).

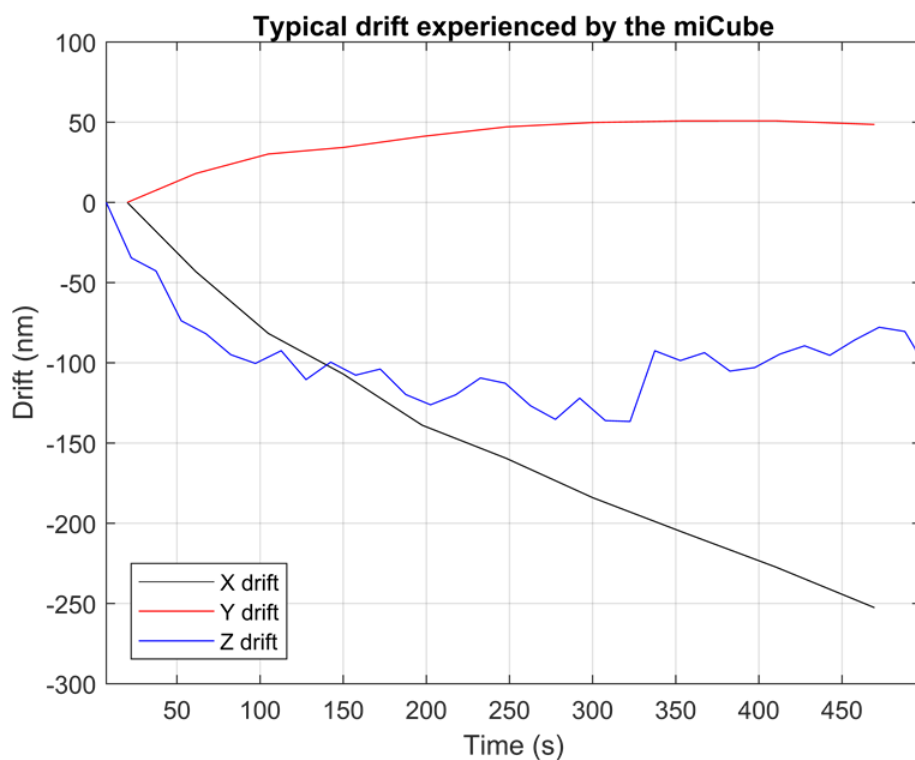

### Supplementary Figure 3: Typical drift experienced by the miCube

Typical drift in X (black), Y (red), and Z (blue) as experienced by the miCube used throughout this study.

Repetition of this experiment led to the values specified in the main text.

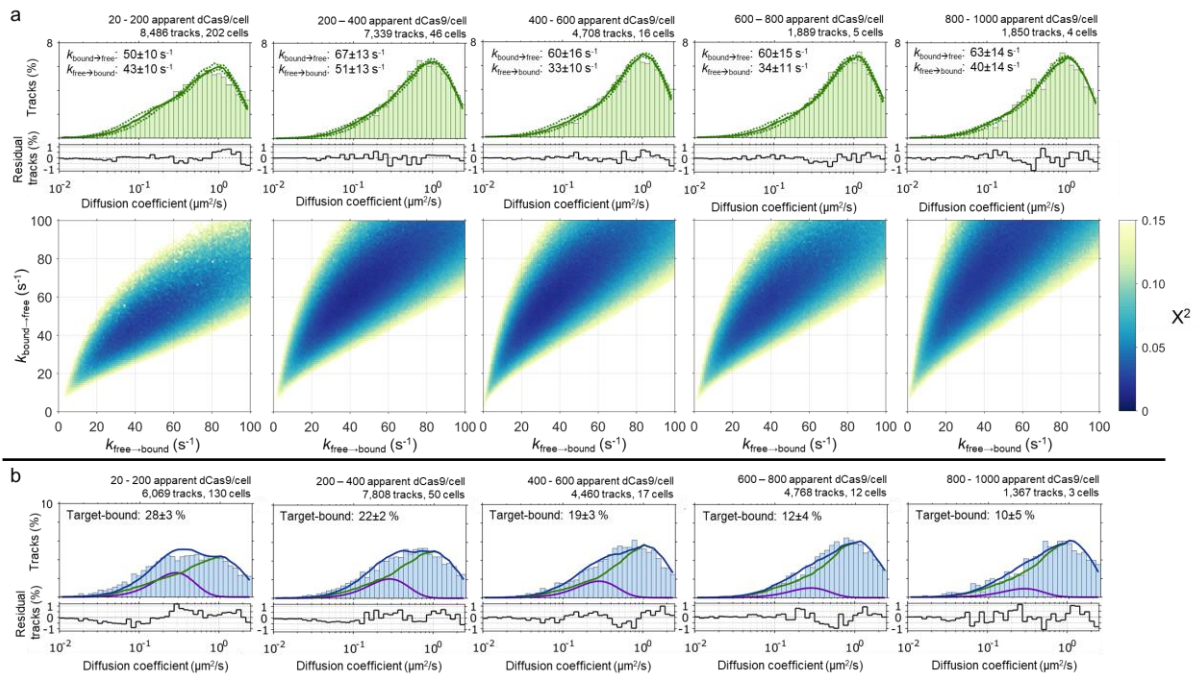

### Supplementary Figure 4: Individual pNonTarget and pTarget distributions

**a** All five pNonTarget diffusional distributions fitted with MC-DDA, as explained in the main text, Methods section, and Fig. 2. At the bottom, the Chi-squared value is plotted for a range of MC-DDAs (100k simulated proteins) with different  $k_{\text{free} \rightarrow \text{bound}}$  and  $k_{\text{bound} \rightarrow \text{free}}$ . **b** All five pTarget diffusional distributions fitted with the computational target-binding model, as explained in the main text, Methods section, and Fig. 3. Source data are provided as a Source Data file.

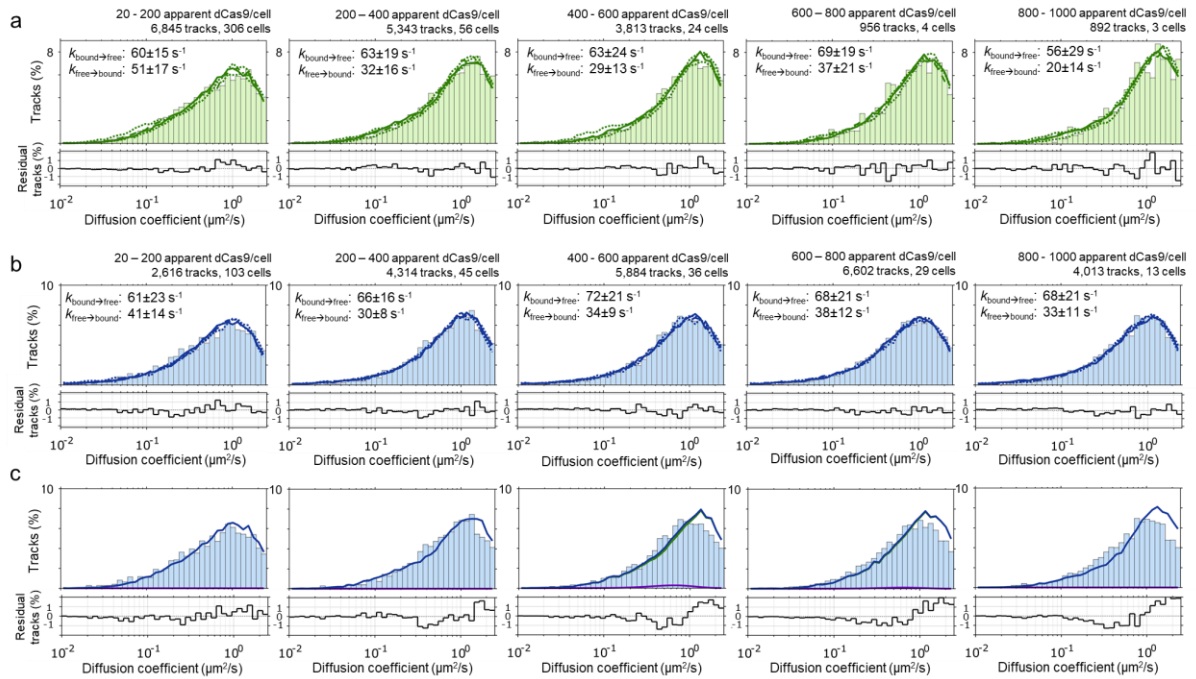

### Supplementary Figure 5: no-sgRNA distributions fitted with MC-DDA or the target-binding model

**a** The five no-sgRNA pNonTarget diffusional distributions were fitted with MC-DDA as explained in the main text, Methods section. **b** The five no-sgRNA pTarget diffusional distributions were fitted with MC-DDA, as explained in the main text, Methods section. We note that the found kinetic rates are not significantly different from the no-sgRNA pNonTarget rates. **c** The five no-sgRNA pTarget diffusional distributions were fitted with a combination of the fixed no-sgRNA pNonTarget populations (from **a**) and a global non-fixed bound population. We note that no target-bound dCas9 population can be fitted, while the fitting methodology is identical to that of normal pTarget (Supplementary Figure 4 b). Source data are provided as a Source Data file.

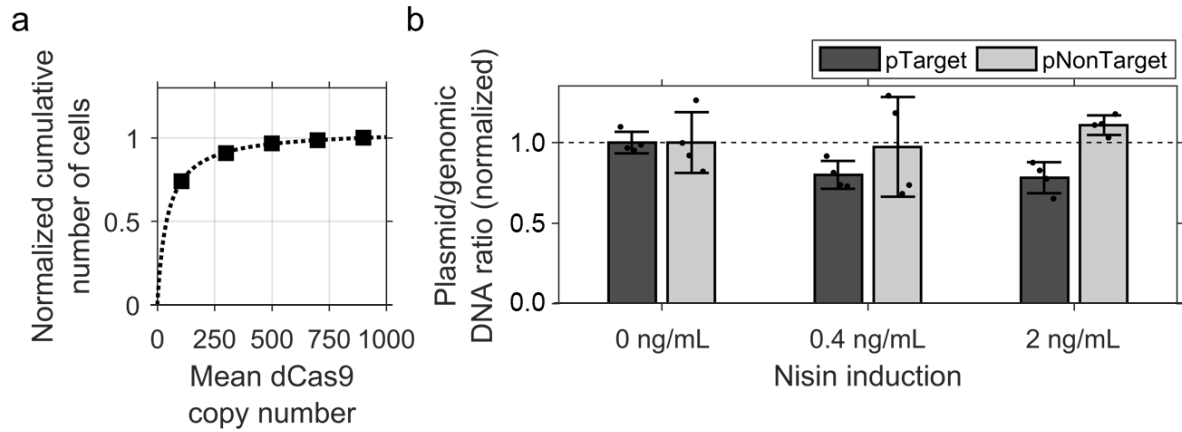

### Supplementary Figure 6: Effect of dCas9 on pTarget copy number

**a** Representative normalized cumulative number of cells that have certain mean dCas9 copy numbers. Black squares are values taken from pNonTarget dataset, the dotted line is a fitted curve with equation  $y = 1.05 * [\text{dCas9 copy number}] / (44 * [\text{dCas9 copy number}])$ . **b** Normalized qPCR-determined ratio of plasmid:genome DNA for pTarget and pNonTarget for different Nisin induction. Error bars are the standard deviation determined from the average of two biological replicates (both averaged on two technical replicates). Individual data points are plotted as black circular markers. Source data are provided as a Source Data file.

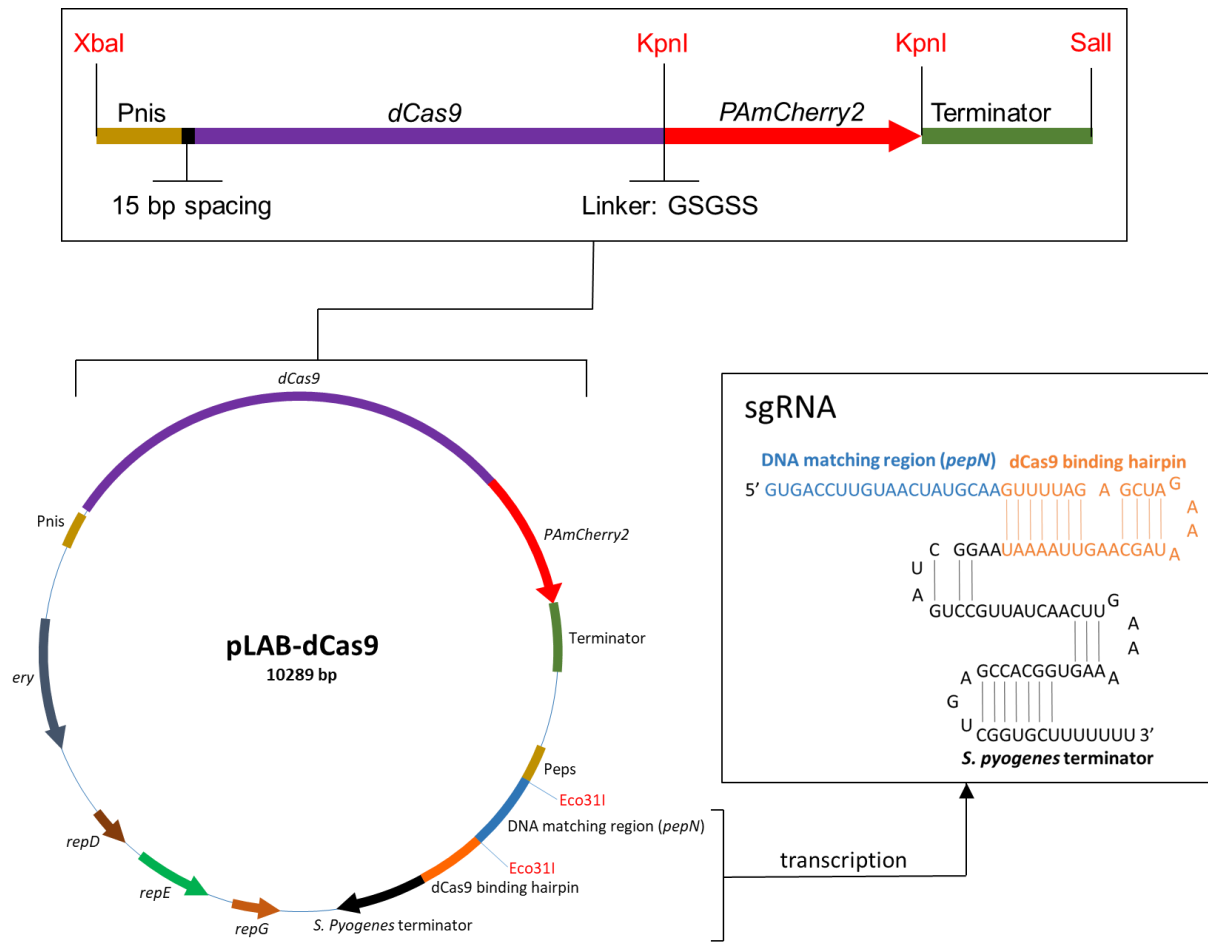

### Supplementary Figure 7: Outline of the pLAB-dCas9 vector

**Top:** The sequence encoding dCas9<sup>1</sup> (*S. pyogenes*; AddGene.org plasmid #44249) is fused to the sequence encoding PAmCherry2<sup>27</sup> (AddGene.org plasmid #31932) with a flexible linker (amino acid sequence GSGSS), downstream of the *nisA*-promoter (Pnis) with an ribosomal binding site (15 bp spacing) and ending with a transcriptional terminator sequence derived from a lactococcal *pepN* gene. PAmCherry2 is flanked by two KpnI sites which should allow for interchanging fluorophores. The whole sequence is flanked by XbaI and SalI restriction sites to allow convenient cloning into a (expression) vector of choice. **Bottom:** The pLAB-dCas9 expression vector consists of PAmCherry2-labelled dCas9, an erythromycin resistance marker (Ery) and replication genes (*repD*, *repE* and *repG*)<sup>73</sup>. The *pepN* DNA matching region together with the dCas9 binding hairpin and the *S. pyogenes* terminator form the sgRNA, which is expressed under a constitutive promoter (*Peps*). Once the sgRNA molecule is transcribed, it folds to form the secondary structure that allows complex formation with dCas9.



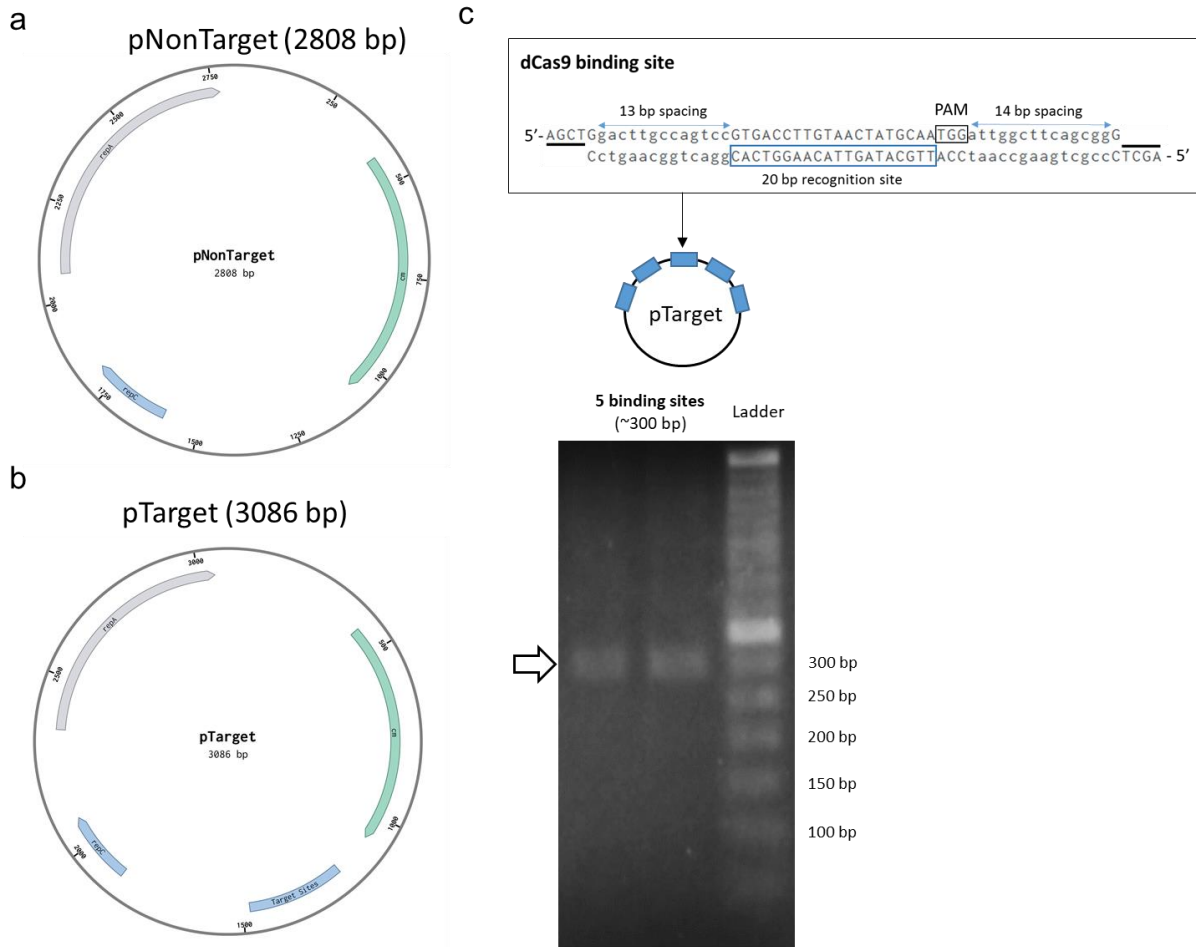

### Supplementary Figure 8: pNonTarget and pTarget construction and verification

**a,b** Vector maps of pNonTarget and pTarget. Both targets contain *repA* and *repC* (DNA replication initiators) and a chloramphenicol-resistance marker (*cm*). Moreover, pTarget contains 5 target sites specified at 'Target Sites'. **c** dCas9 binding sites consisting of a 20 base pairs *pepN* recognition site, a 5'-NGG-3' PAM sequence, and spacing and overhang sequence motifs that are complementary to each other (indicated with black stripes) were annealed and ligated. This formed an array of five dCas9 binding sites in pNZ123, resulting in pTarget. Digestion and subsequent gel electrophoresis of plasmids isolated from two colonies revealed the expected length of the binding array in pTarget. One binding site is 54 base pairs in length, the final array of five binding sites is 278 base pairs (the expected PCR amplicon is 300 base pairs). Source data are provided as a Source Data file.

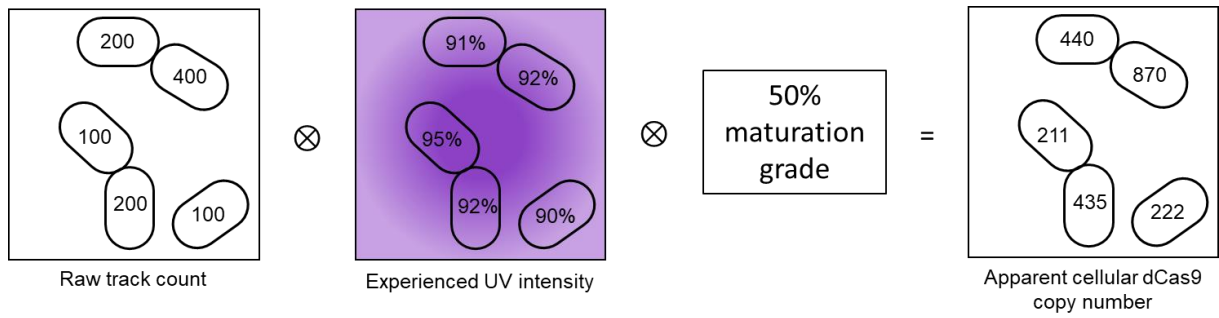

**Supplementary Figure 9: Schematic representation of obtaining cellular dCas9 copy number from number of tracks**

The raw track count (first subfigure) is convoluted with the experience UV intensity that the cell on average experienced (second subfigure; deduced via reflective scattering of excitation lasers), and with the expected maturation grade of PAmCherry2 (Methods).

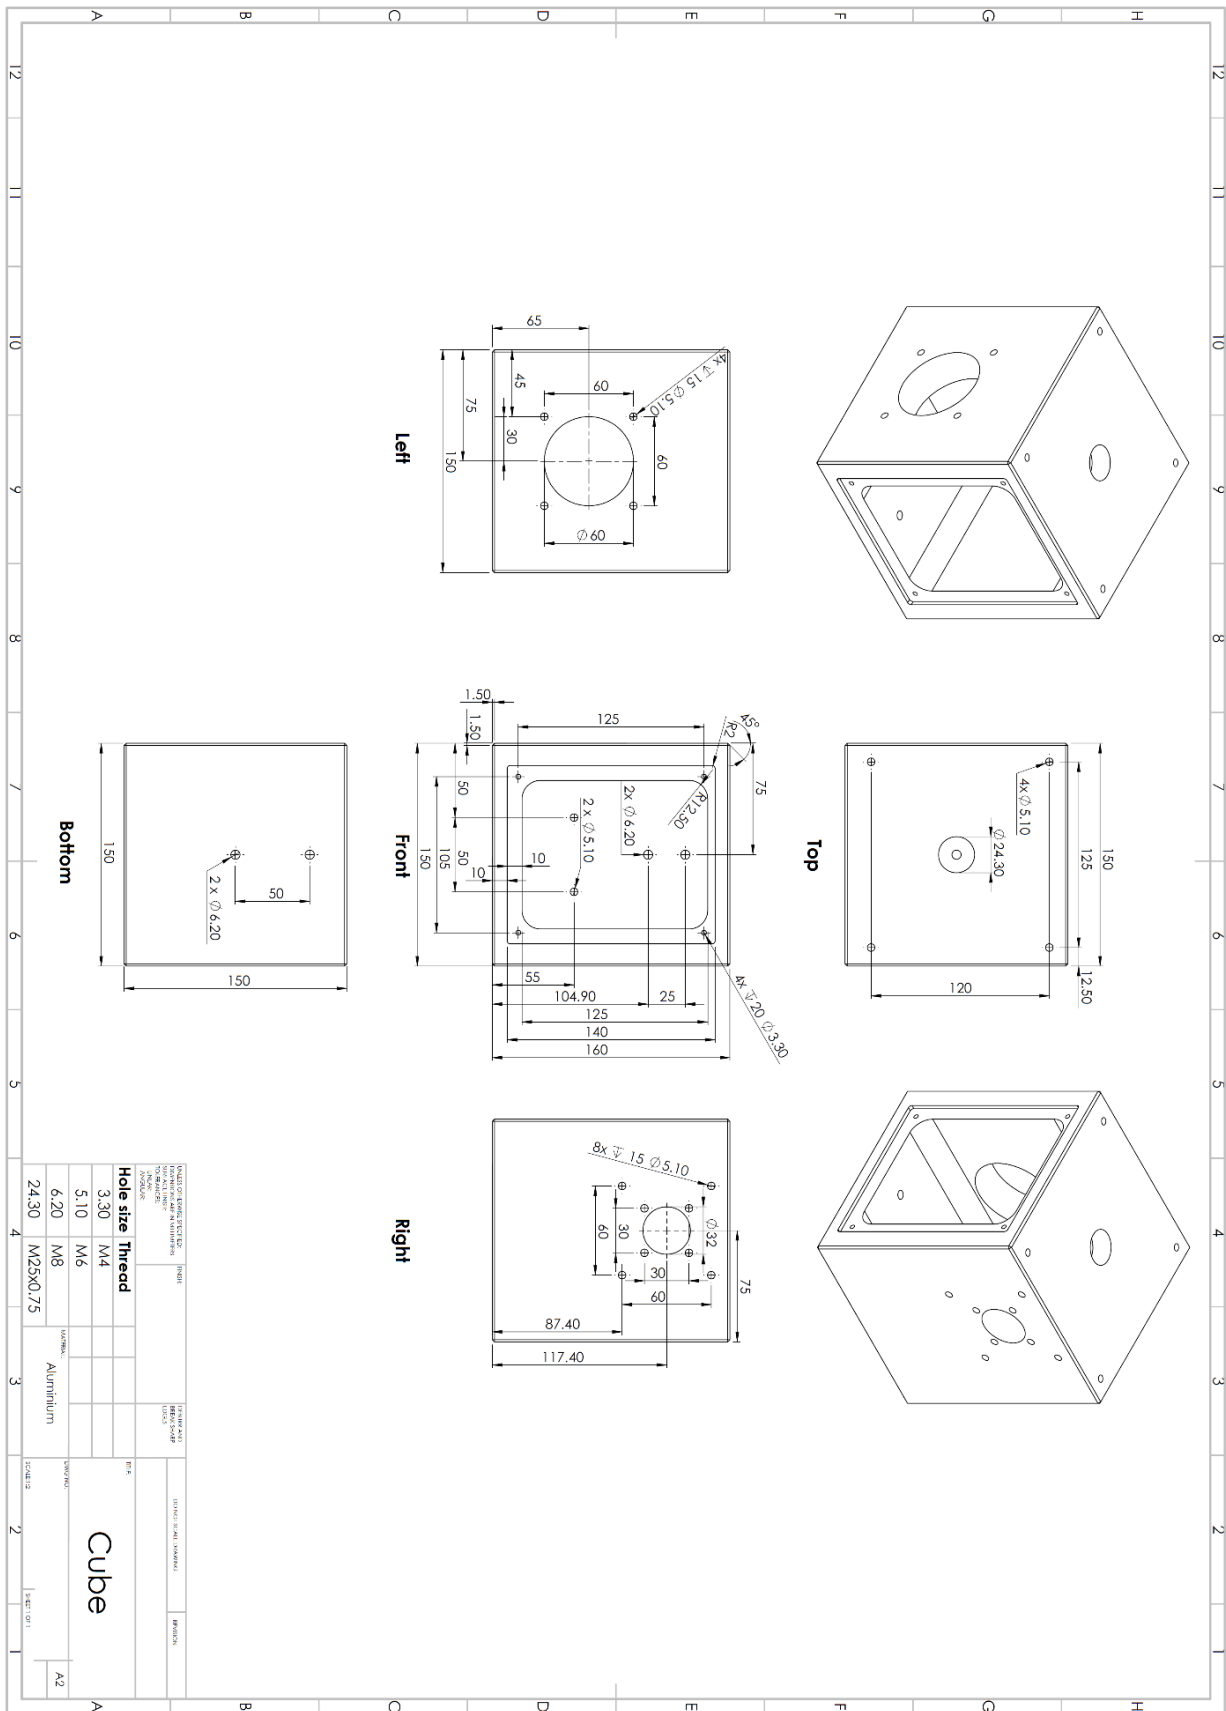

Supplementary Figure 10: Technical drawing of miCube component: Main cube

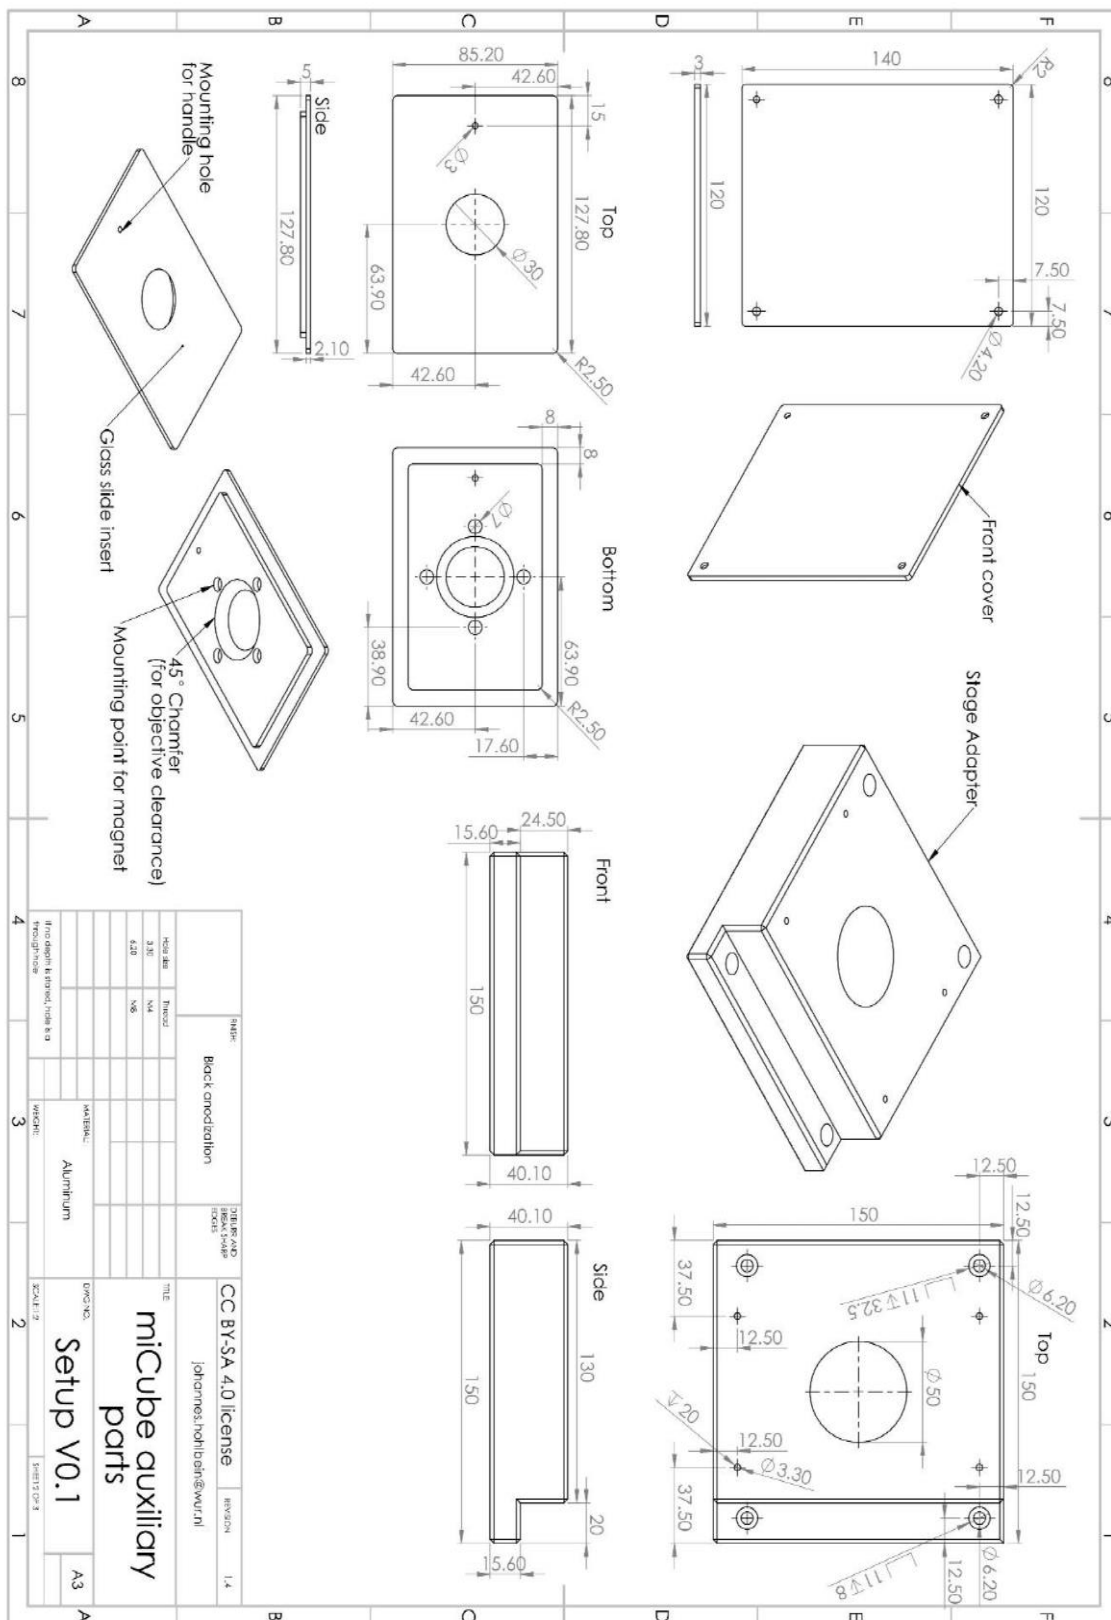

Supplementary Figure 11: Technical drawing of miCube component: Top cover 1

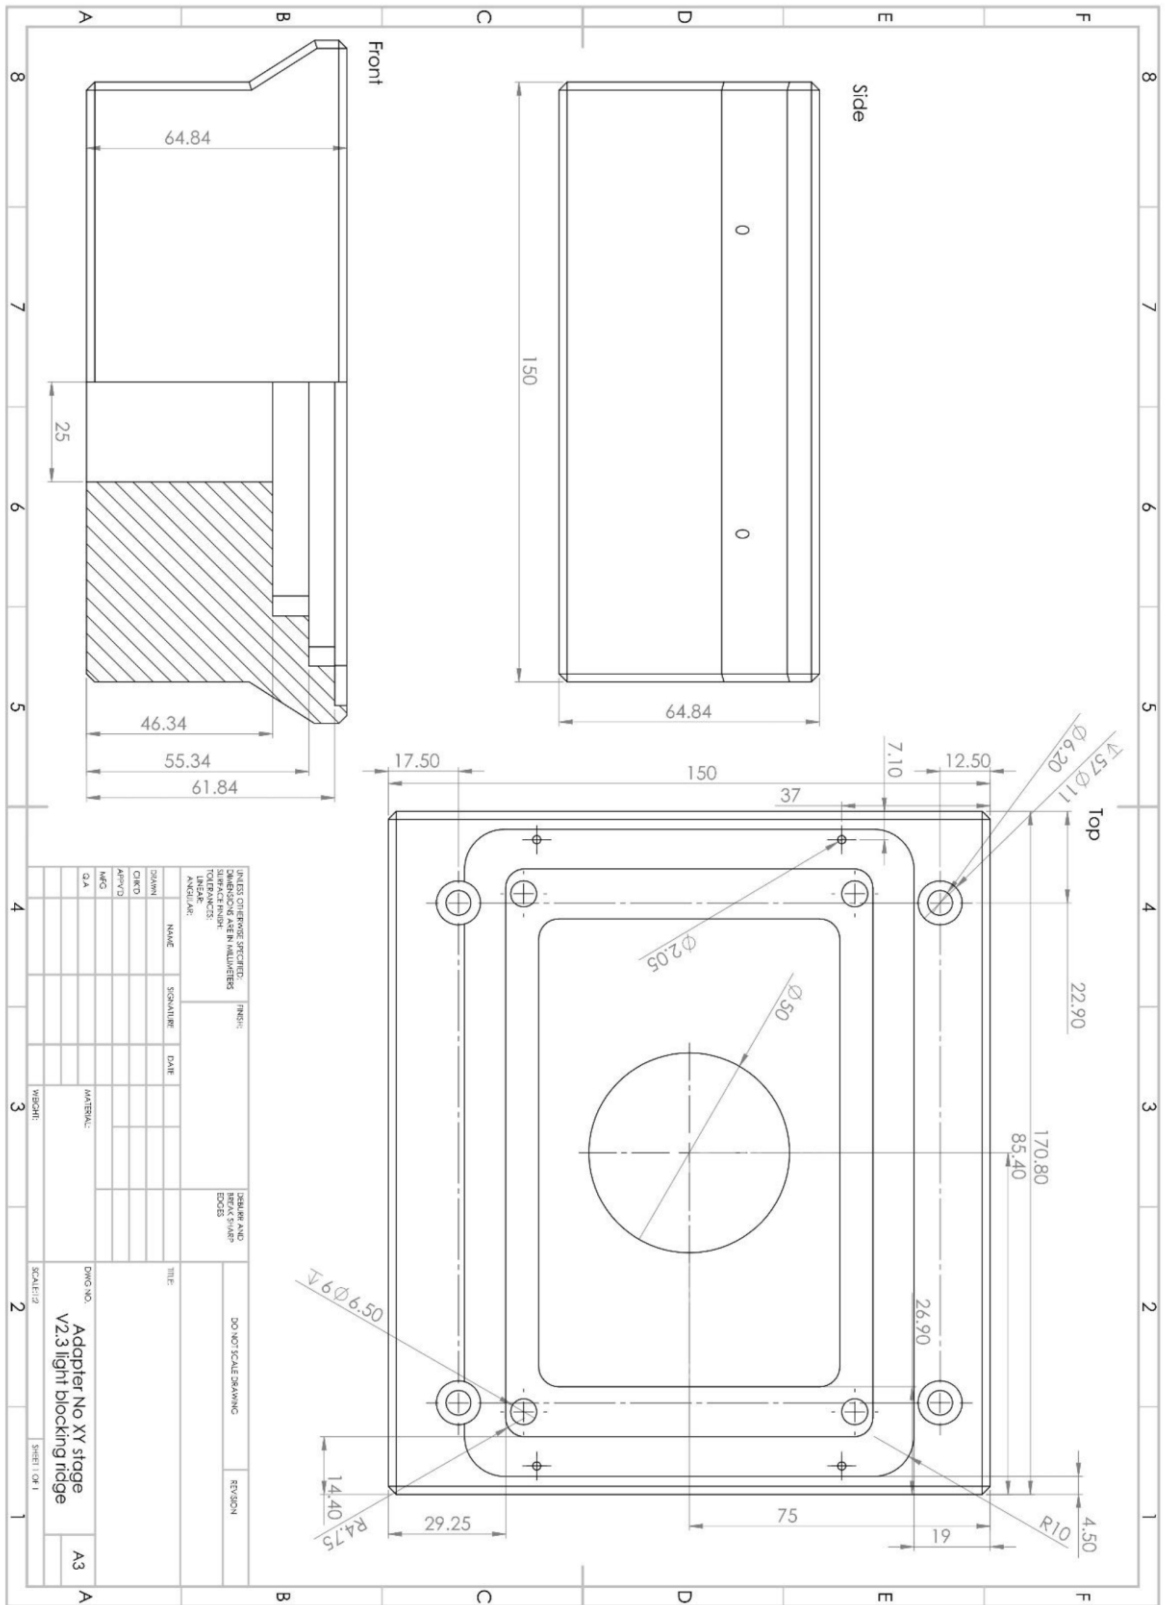

Supplementary Figure 12: Technical drawing of miCube component: Top cover 2

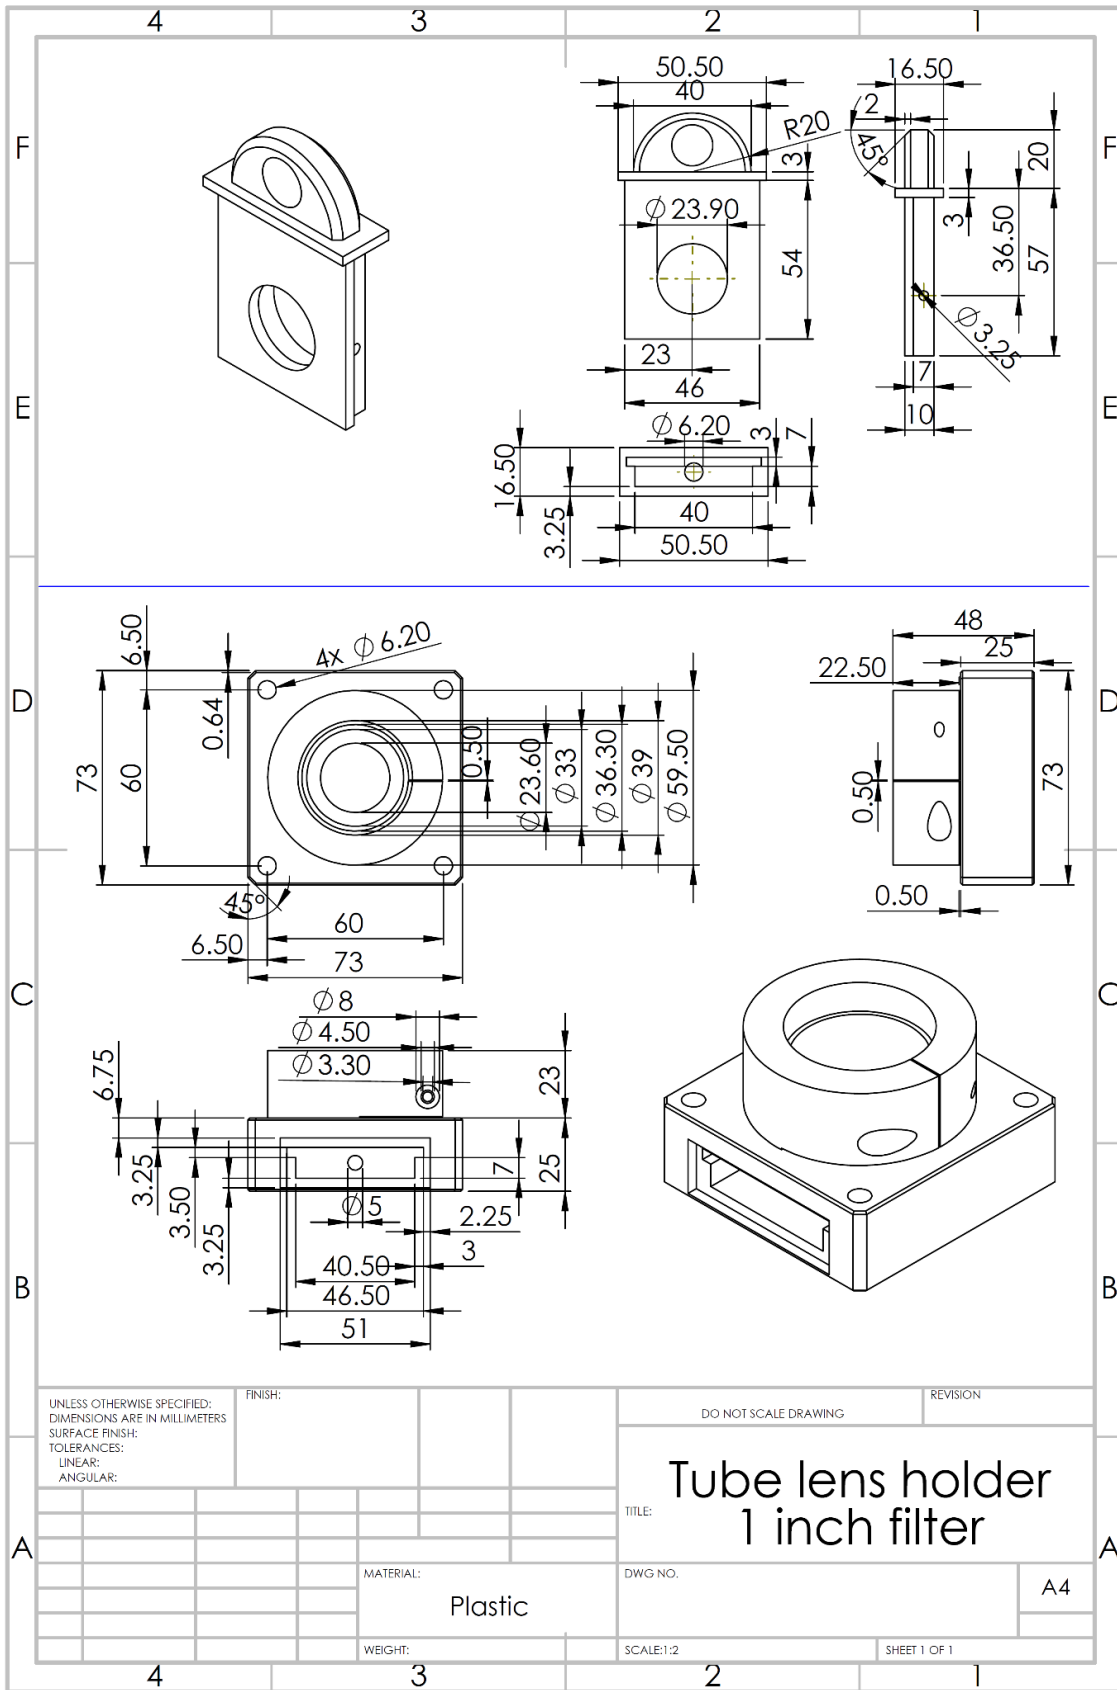

**Supplementary Figure 13: Technical drawing of miCube component: Tube lens holder**

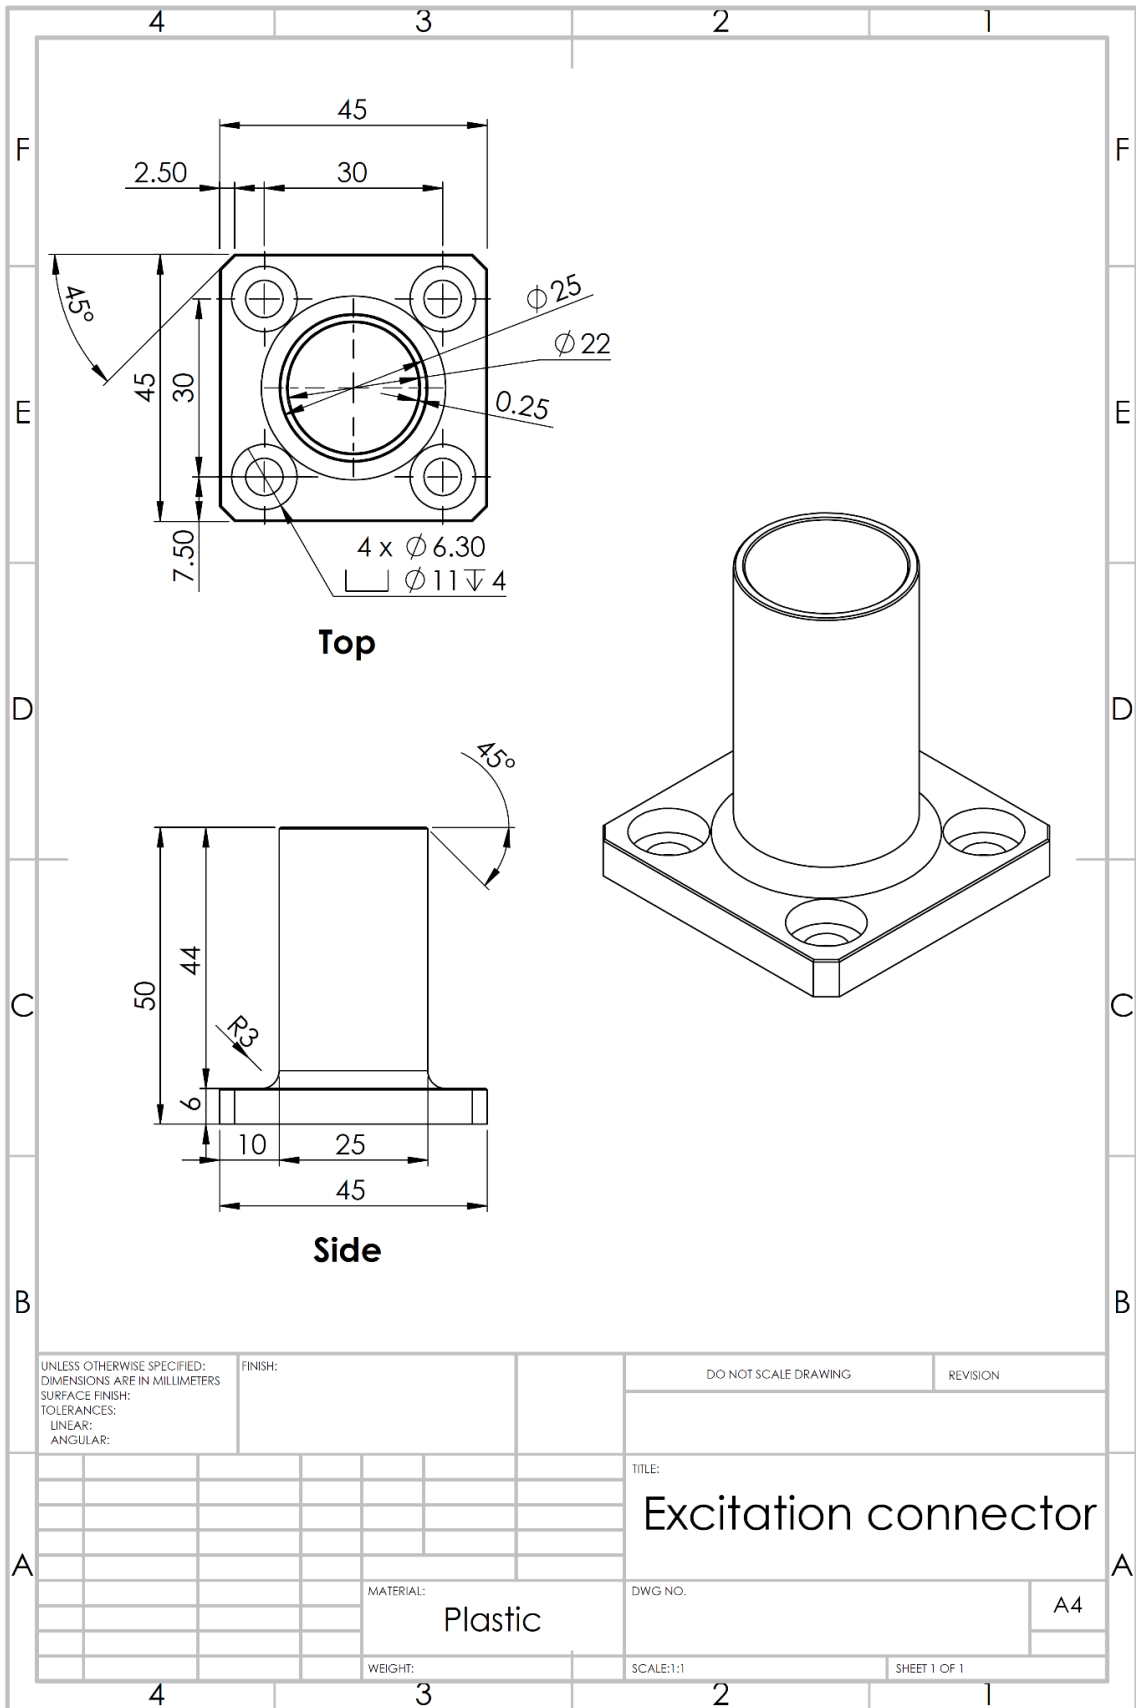

**Supplementary Figure 14: Technical drawing of miCube component: Excitation connector**





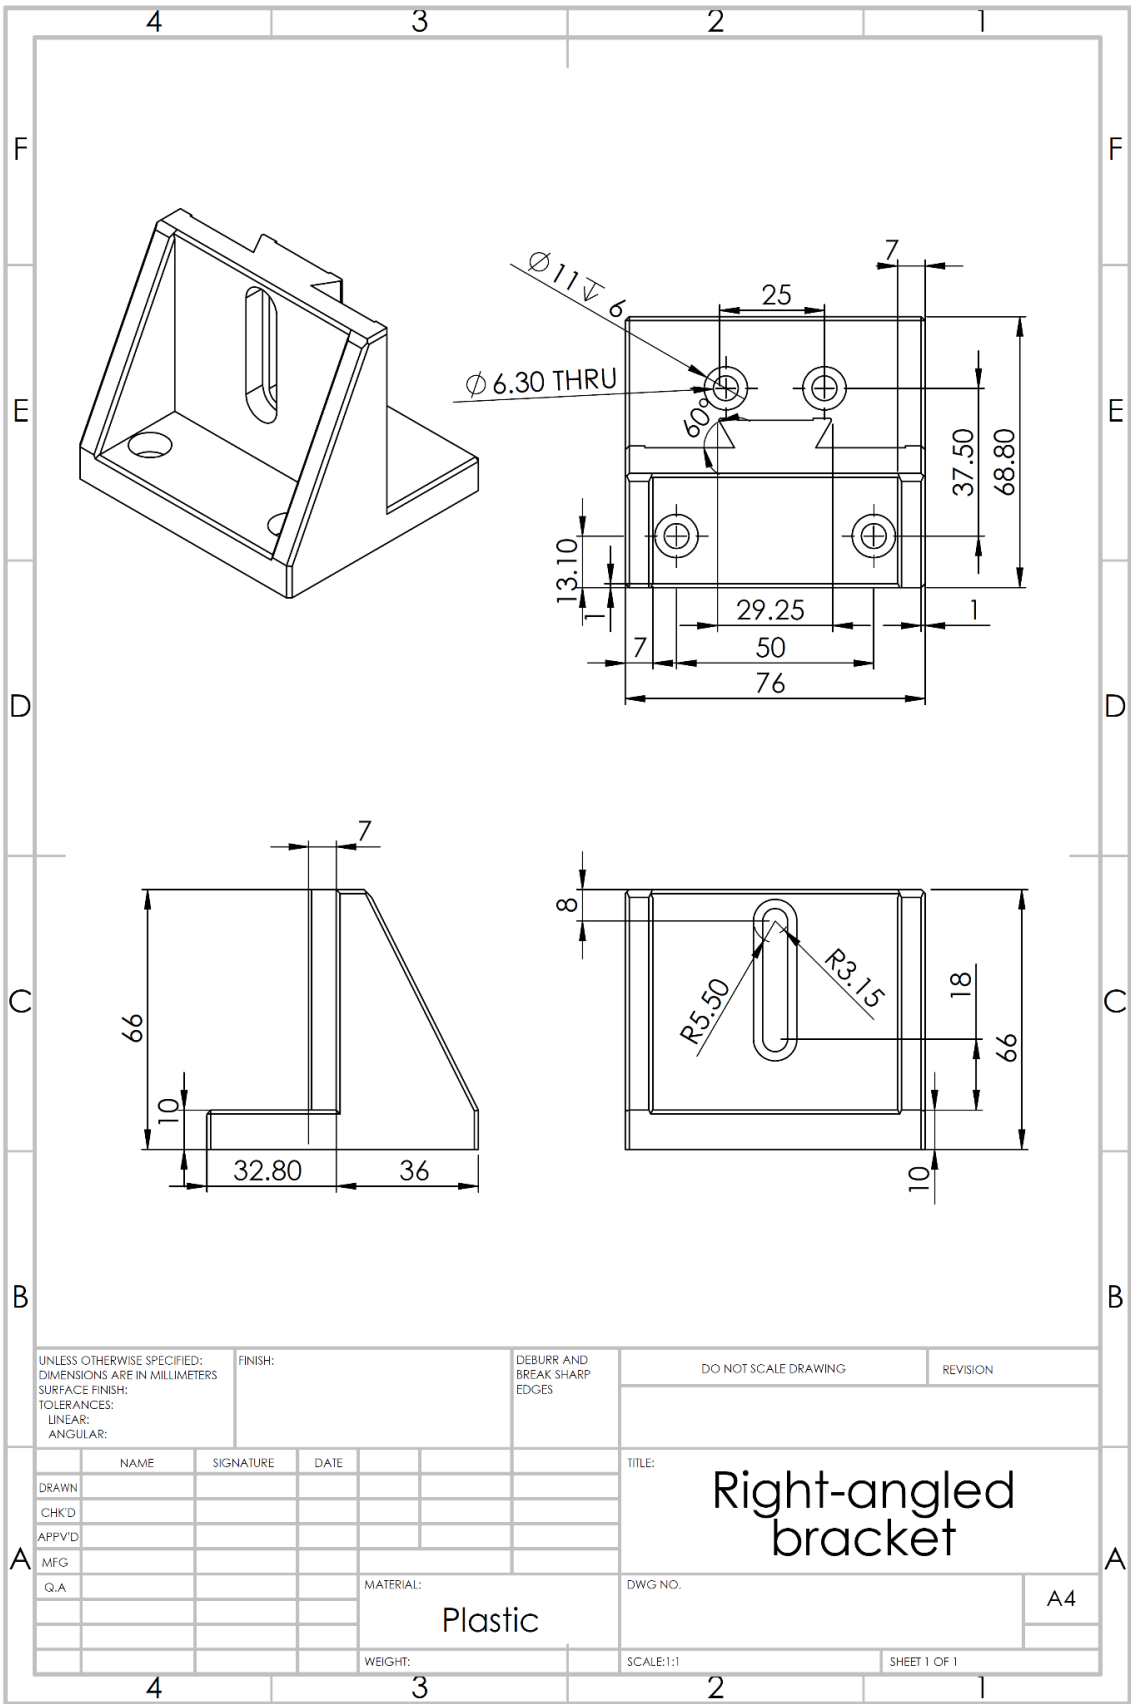

**Supplementary Figure 16: Technical drawing of miCube component: Right-angled bracket**



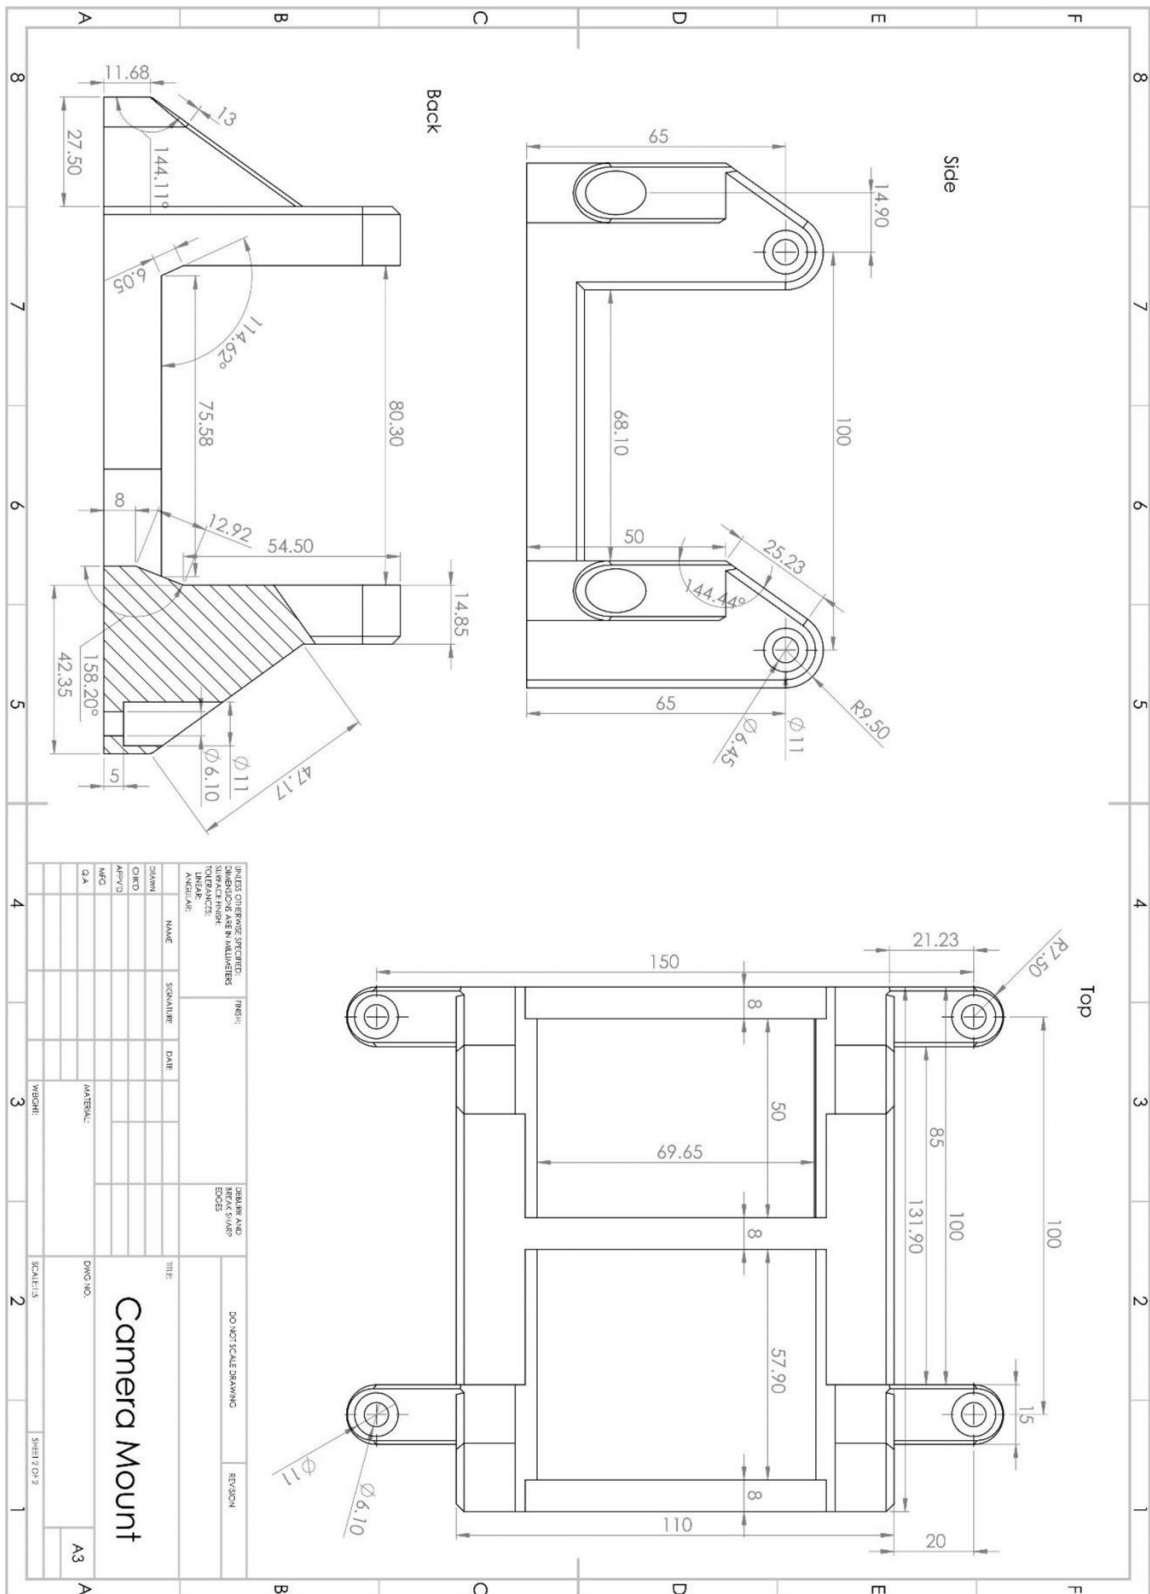

Supplementary Figure 18: Technical drawing of miCube component: Camera mount



QKKTMGWETLSERMYPEDGALKGELKARTKLDGGHYDTEVKTTYKAKKPVQLPGAYNVNRKLDITSHNEDYTIIVEQYERAEGHSTGGMDELY  
K\*

The asterisk (\*) represents the stop codon 'taa'.

**Supplementary Table 1: Descriptive list of miCube components.**

| Main cube |                        |                                                        |                                                                                     |
|-----------|------------------------|--------------------------------------------------------|-------------------------------------------------------------------------------------|
| Nr        | Description            | Details                                                | Manufacturer                                                                        |
| 1         | Glass plate insert     |                                                        | Custom built – CNC milled                                                           |
| 2         | ASI XYZ stage          | MS-2000 stage with Piezoconcept Z-insert               | Applied Scientific Instrumentation, Eugene, OR, USA; and Piezoconcept, Lyon, France |
| 3         | Objective              | TIRF 1.49NA HP SR objective                            | Nikon, Amsterdam, The Netherlands                                                   |
| 4         | TopCover               |                                                        | Custom built – CNC milled                                                           |
| 5         | miCube block           |                                                        | Custom built – CNC milled                                                           |
| 6         | Neutral density filter | NE60A-A                                                | Thorlabs GmbH, Dachau/Munich, Germany                                               |
| 7         | Dichroic mirror holder | DFM1/M                                                 | Thorlabs GmbH, Dachau/Munich, Germany                                               |
|           | Dichroic mirror        | ZT405/488/561rpc-UF2<br>or<br>ZT405/488/561/640rpc-UF2 | Chroma, Bellows Falls, VT, USA                                                      |
| 8         | TIRF filter            | ZET405/488/561m-TRF<br>or<br>ZET405/488/561/640m-TRF   | Chroma, Bellows Falls, VT, USA                                                      |
| 9         | Connector              | C4W-CC                                                 | Thorlabs GmbH, Dachau/Munich, Germany                                               |
| 10        | 45° elliptical mirror  | KCB1E/M and BBE1-E02                                   | Thorlabs GmbH, Dachau/Munich, Germany                                               |
| 11        | Cover                  |                                                        | Custom built – 3D printed                                                           |

## Excitation path

| Nr | Description                  | Details                                                                                                     | Manufacturer                          |
|----|------------------------------|-------------------------------------------------------------------------------------------------------------|---------------------------------------|
| 12 | Spacer                       |                                                                                                             | Custom built – 3D printed             |
| 13 | Reflective collimator holder |                                                                                                             | Custom built – 3D printed             |
| 14 | Right-angle mounting plate   |                                                                                                             | Custom built – 3D printed             |
| 15 | 25 mm Translation Stage      | PT1/M                                                                                                       | Thorlabs GmbH, Dachau/Munich, Germany |
| 16 | TIRF lens                    | AC254-200-A-ML                                                                                              | Thorlabs GmbH, Dachau/Munich, Germany |
| 17 | Aperture                     | SM1D12SZ                                                                                                    | Thorlabs GmbH, Dachau/Munich, Germany |
| 18 | Reflective collimator        | RC12APC-F01                                                                                                 | Thorlabs GmbH, Dachau/Munich, Germany |
| -  | Laser box                    | Lighthub 6 containing 4 lasers at 405 nm (60 mW), 488 nm (200 mW), 561 nm (500 mW), and 642 nm (2x 200 mW). | Omicron, Rodgau-Dudenhofen, Germany   |

| Emission path |                         |                                           |                                       |
|---------------|-------------------------|-------------------------------------------|---------------------------------------|
| Nr            | Description             | Details                                   | Manufacturer                          |
| 19            | Camera                  | Zyla 4.2 PLUS                             | Andor, Belfast, Northern Ireland      |
| 20            | Camera Mount            |                                           | Custom built – 3D printed             |
| 21            | Astigmatism block       |                                           | Custom built – 3D printed             |
| 22            | Astigmatism lens        | LJ1516RM or LJ1144RM                      | Thorlabs GmbH, Dachau/Munich, Germany |
| 23            | Astigmatism lens holder |                                           | Custom built – 3D printed             |
| 24            | Astigmatism lens holder |                                           | Custom built – 3D printed             |
| 25            | Cover                   | SC600, cut to length                      | Thorlabs GmbH, Dachau/Munich, Germany |
| 26            | Connector               |                                           | Custom built – 3D printed             |
| 27            | Emission filter         | ET525/50m or<br>ET595/50m or<br>ET700/75m | Chroma, Bellows Falls, VT, USA        |
| 28            | Emission filter holder  |                                           | Custom built – 3D printed             |
| 29            | Tube lens holder        |                                           | Custom built – 3D printed             |
| 30            | Tube lens               | ITL200                                    | Thorlabs GmbH, Dachau/Munich, Germany |



### 3D printing (Ultimaker 2+) settings

| Nr          | Material | Support | Adhesion | Layer height (µm) | Top / Bottom Thickness (mm) | Wall Thickness (mm) | Infill % |
|-------------|----------|---------|----------|-------------------|-----------------------------|---------------------|----------|
| 13/14       | PLA      | Yes     | Brim (5) | 200               | 1.0                         | 1.2                 | 20       |
| 20/26       | ABS      | Yes     | Brim (5) | 200               | 0.8                         | 0.8                 | 20       |
| 21/23/24/28 | PLA      | Yes     | Brim (5) | 200               | 1.0                         | 1.6                 | 20       |

Numbers are in accordance with Supplementary Figure 1. Entities marked with custom-built have their complete technical drawings present in Supplementary Figures 10-18. A more exhaustive list can be found on [https://HohlbeinLab.github.io/miCube/component\\_table.html](https://HohlbeinLab.github.io/miCube/component_table.html).

**Supplementary Table 2: List of vectors**

| Vector             | Relevant properties                                                         | Size (kb) | Selection marker | Reference                |
|--------------------|-----------------------------------------------------------------------------|-----------|------------------|--------------------------|
| pNZ123             | Vector replicating in <i>L. lactis</i> .                                    | 2.8       | Chloramphenicol  | de Vos, 1987             |
| pLABTarget         | Encoding functional Cas9 expression system                                  | 10        | Erythromycin     | van der Els et al., 2018 |
| pNonTarget         | pNZ123 without binding sites                                                | 2.8       | Chloramphenicol  | This study               |
| pTarget            | pNZ123 containing five binding sites cognate to <i>pepN</i> sgRNA           | 3.1       | Chloramphenicol  | This study               |
| pLAB-dCas9-nosgRNA | Cas9 module of pLABTarget replaced with Pnis – dCas9 – PAmCherry2           | 10.2      | Erythromycin     | This study               |
| pLAB-dCas9         | pLAB-dCas9-nosgRNA with added <i>pepN</i> sgRNA under constitutive promoter | 10.3      | Erythromycin     | This study               |

**Supplementary Table 3: List of oligonucleotides.**

| Experiment              | Construct                                                                         | Oligonucleotide (5'- 3')                 |
|-------------------------|-----------------------------------------------------------------------------------|------------------------------------------|
| pTarget construction    | Forms <i>pepN</i> dCas9 binding site with complementary overhangs upon annealing. | AGCTGGACTTGCCAGTCCGTGACCTTGTAAGTATGCAATG |
|                         |                                                                                   | GATTGGCTTCAGCGG                          |
|                         |                                                                                   | AGCTCCCCTGAAGCCAATCCATTGCATAGTTACAAGGT   |
|                         |                                                                                   | CACGGACTGGCAAGTCC                        |
| pLAB-dCas9 construction | Forms <i>pepN</i> sgRNA upon annealing.                                           | TGATGTGACCTTGTAAGTATGCAA                 |
|                         |                                                                                   | AAACTTGCATAGTTACAAGGTCAC                 |

**Supplementary Table 4: List of primers.**

| Experiment                            | Construct                                                | Primer sequence (F=forward, R=reverse) |
|---------------------------------------|----------------------------------------------------------|----------------------------------------|
| PCR insert validations and colony PCR | For pNZ123 (to check <i>pepN</i> binding site insertion) | F: TGAGATAATGCCGACTGTAC                |
|                                       |                                                          | R: CATTCAAGTCATCGGCTTTCA               |
|                                       | For pLAB-dCas9 (to check <i>pepN</i> sgRNA insertion)    | F: TGATGTGACCTTGTAAGTATGCAA            |
|                                       |                                                          | R: TTGAAGAACCCGATTACATGG               |
| qPCR                                  | Q1, Q2: pTarget/pNonTarget                               | F: ACGAAAGTCGACGGCAATAGTT              |
|                                       |                                                          | R: CGTTTGTGAACTAATGGGTGC               |
|                                       | Q3, Q4: Nested pNonTarget                                | F: GGGAGCGGAGTTTGAATTT                 |
|                                       |                                                          | R: ATAACCTAACTCTCCGTCGC                |
|                                       | Q5, Q6: ColonyCount                                      | F: TCGATATGCACGTTGTCACC                |
|                                       |                                                          | R: CCCTCTCAGCTGCAATCTCT                |
|                                       | Q7, Q8: Nested qPCR Colony                               | F: GTGCTGAACCAGCGATTACA                |
|                                       |                                                          | R: TTGCTTTCACGTCAAGTTGG                |

**Supplementary Table 5: Adjustment of the 405 nm laser power during sptPALM experiments.**

| <b>TIME (S)</b> | <b>APPROXIMATE 405 NM LASER POWER FOR PHOTO ACTIVATION (<math>\mu\text{W}/\text{CM}^2</math>)</b> |
|-----------------|---------------------------------------------------------------------------------------------------|
| 0               | 2.7                                                                                               |
| 30              | 2.8                                                                                               |
| 50              | 3.2                                                                                               |
| 70              | 3.8                                                                                               |
| 100             | 4.7                                                                                               |
| 130             | 6.2                                                                                               |
| 150             | 8.9                                                                                               |
| 180             | 13.7                                                                                              |
| 200             | 20.1                                                                                              |
| 220             | 27.6                                                                                              |
| 240             | 36.2                                                                                              |
| 260             | 46.1                                                                                              |
| 280             | 62.1                                                                                              |
| 300             | 78.1                                                                                              |
| 320             | 83.8                                                                                              |
| 340             | 97.0                                                                                              |
| 360             | 113.9                                                                                             |
| 380             | 126.3                                                                                             |
| 400             | 146.2                                                                                             |
| 430             | 194.4                                                                                             |
| 450             | 260.7                                                                                             |
| 470             | 320.9                                                                                             |
| 490             | 383.6                                                                                             |
| 510             | 455.4                                                                                             |
| 530             | 508.4                                                                                             |
| 540             | 619.0                                                                                             |
