# Supplementary material for: Visualisation of dCas9 target search in vivo using an open-microscopy framework
Source: PubMed Central journal article supplement (PMC6685946; doi:10.1038/s41467-019-11514-0), 2019-08-07
Supplement: 41467_2019_11514_MOESM3_ESM.pdf [file 41467_2019_11514_MOESM3_ESM.pdf]

## Description of Additional Supplementary Files

**File name:** Supplementary Software 1

**Description:** The Supplementary Software contains the scripts used for data analysis and an accompanying flowchart.
